# Supplementary material for: Transcriptome analysis reveals unique C4-like photosynthesis and oil body formation in an arachidonic acid-rich microalga Myrmecia incisa Reisigl H4301
Source: PubMed Central journal article supplement (PMC3686703; doi:10.1186/1471-2164-14-396), 2013-06-13
Supplement: 1471-2164-14-396-S3.pdf [file 1471-2164-14-396-S3.pdf]

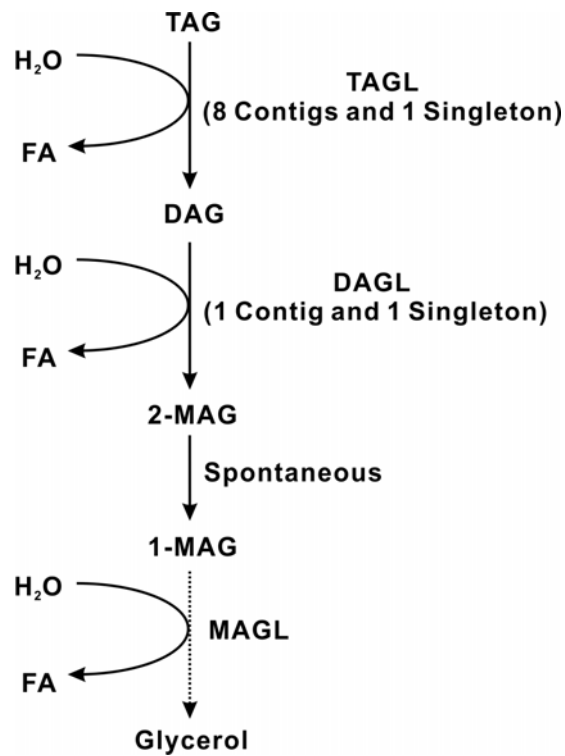

Additional file 3 Triacylglycerol (TAG) degradation model in *M. incisa* H4301 based on annotations in the transcriptome library. The number of the identified enzyme-coding unique sequences is shown in the flow. The dashed line indicates an unidentified route. Abbreviations are listed as follows: TAGL, triacylglycerol lipase; DAGL, diacylglycerol lipase; MAGL, monoacylglycerol lipase; 2-MAG, 2-monoacylglycerol; 1-MAG, 1-monoacylglycerol; FA, fatty acid.
